# Supplementary material
Source: PubMed Central journal article supplement (PMC3436328)
Supplement: supp_M112.350322_jbc.M112.350322-1.pdf [file supp_M112.350322_jbc.M112.350322-1.pdf]

## Supplemental data

## Supplement Table I

*Silent mutations in the coding sequence of SLC7A14*

The sequence of each oligonucleotide is given in sense orientation. As mutation is given the original DNA-base, the site of mutation (numeration starts at ATG) and the current DNA-base.

|                         | <b>Mutation</b> | <b>Oligonucleotide</b>              |
|-------------------------|-----------------|-------------------------------------|
| Insertion of KpnI site  | a1290c          | gtgtcttgctccttcggtaccaacctgagagtg   |
| Deletion of BamHI site  | g75t            | tatgcaatgcactccagaatcctacgcaccaaacc |
| Deletion of BamHI site  | c1986t          | ctccaccatcacatggatacggtttgcggtct    |
| Insertion of BamHI site | g1056t          | gtcagcttgctgggatccctcttcccgat       |

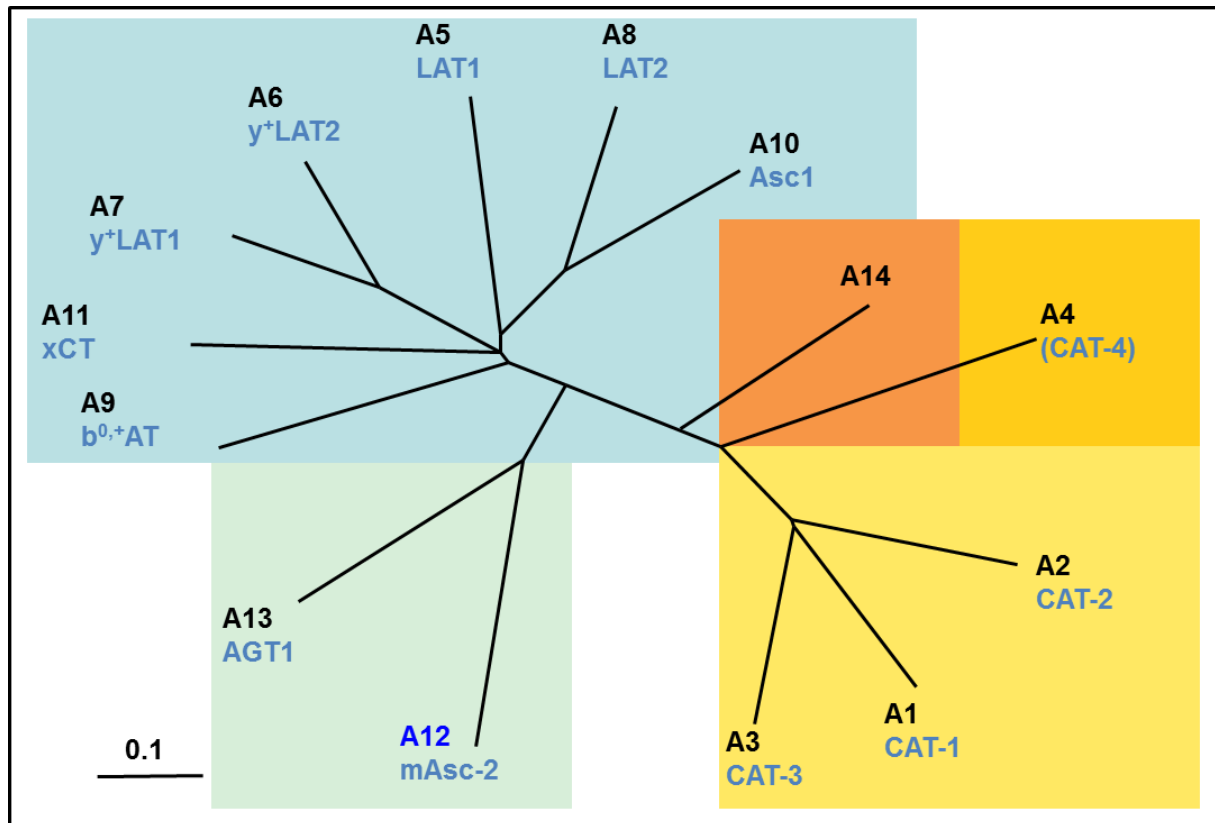

**Supplement Fig.1: Phylogenetic tree of the SLC7 family of amino acid transporters.**

Modified from Verry [2004]. The SLC7 family is composed of two subfamilies formed by the cationic amino acid transporters (hCAT, SLC7A1- 3) and the glycoprotein-associated amino acid transporters [gpaAT, light chains of heterodimeric amino acid transporters (lcHAT)], SLC7A4 and A14 are orphan proteins with unknown function.

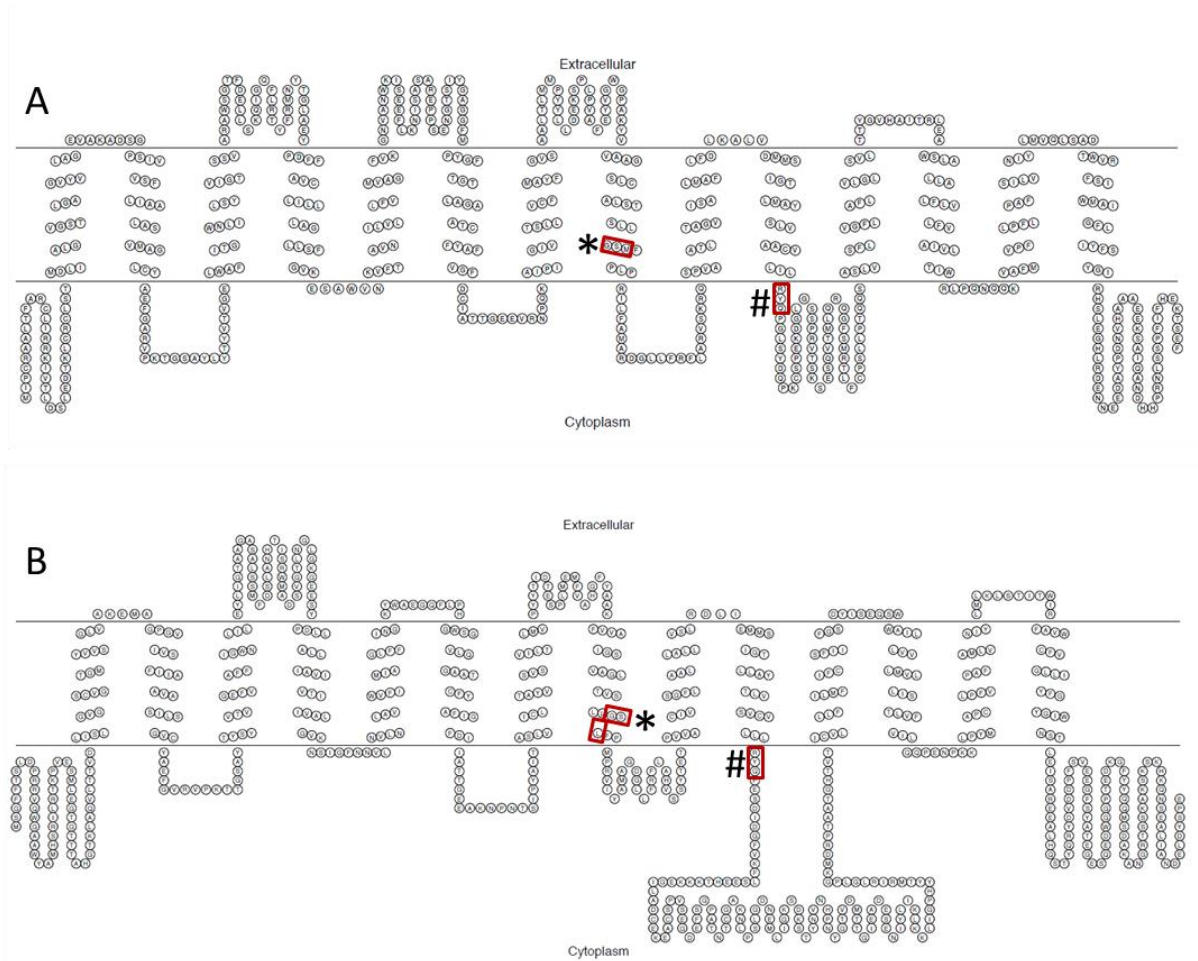

**Supplement Fig.2: Model of hCAT-2A and SLC7A14**

Models of hCAT-2A (A) and SLC7A14 (B) with 14 putative TMs as predicted by most analyses software. These models were generated with the Topo2 program. The positions corresponding to the restriction enzyme recognition sites BamHI (\*) and KpnI (#) that were used to create the chimeric protein hCAT-2/A14\_BK are boxed in red.

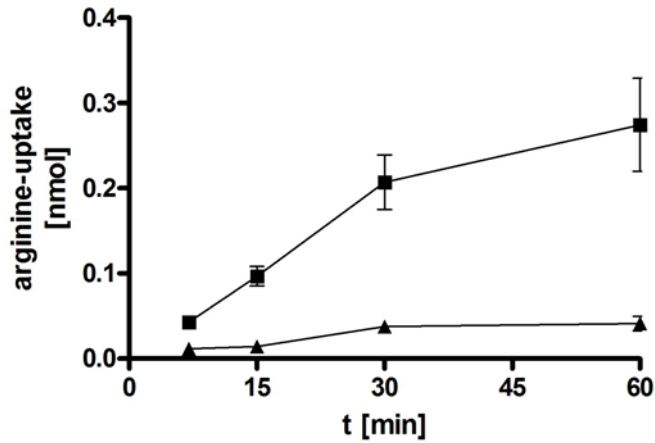

**Supplement Fig.3: Time-course of arginine-uptake in CAT-2/A14\_BK expressing and non-injected *X. laevis* oocytes**

hCAT-2/A14\_BK cRNA was injected in *Xenopus laevis* oocytes. Not injected oocytes served as controls. [ $^3\text{H}$ ]L-arginine uptake into hCAT-2/A14\_BK-expressing (■) and non-injected control oocytes (▲) was measured after 7, 15, 30 and 60 minutes of incubation in 1mM [ $^3\text{H}$ ]L-arginin [10 $\mu\text{Ci/ml}$ ]. The results represent means  $\pm$  SEM (n= 7).

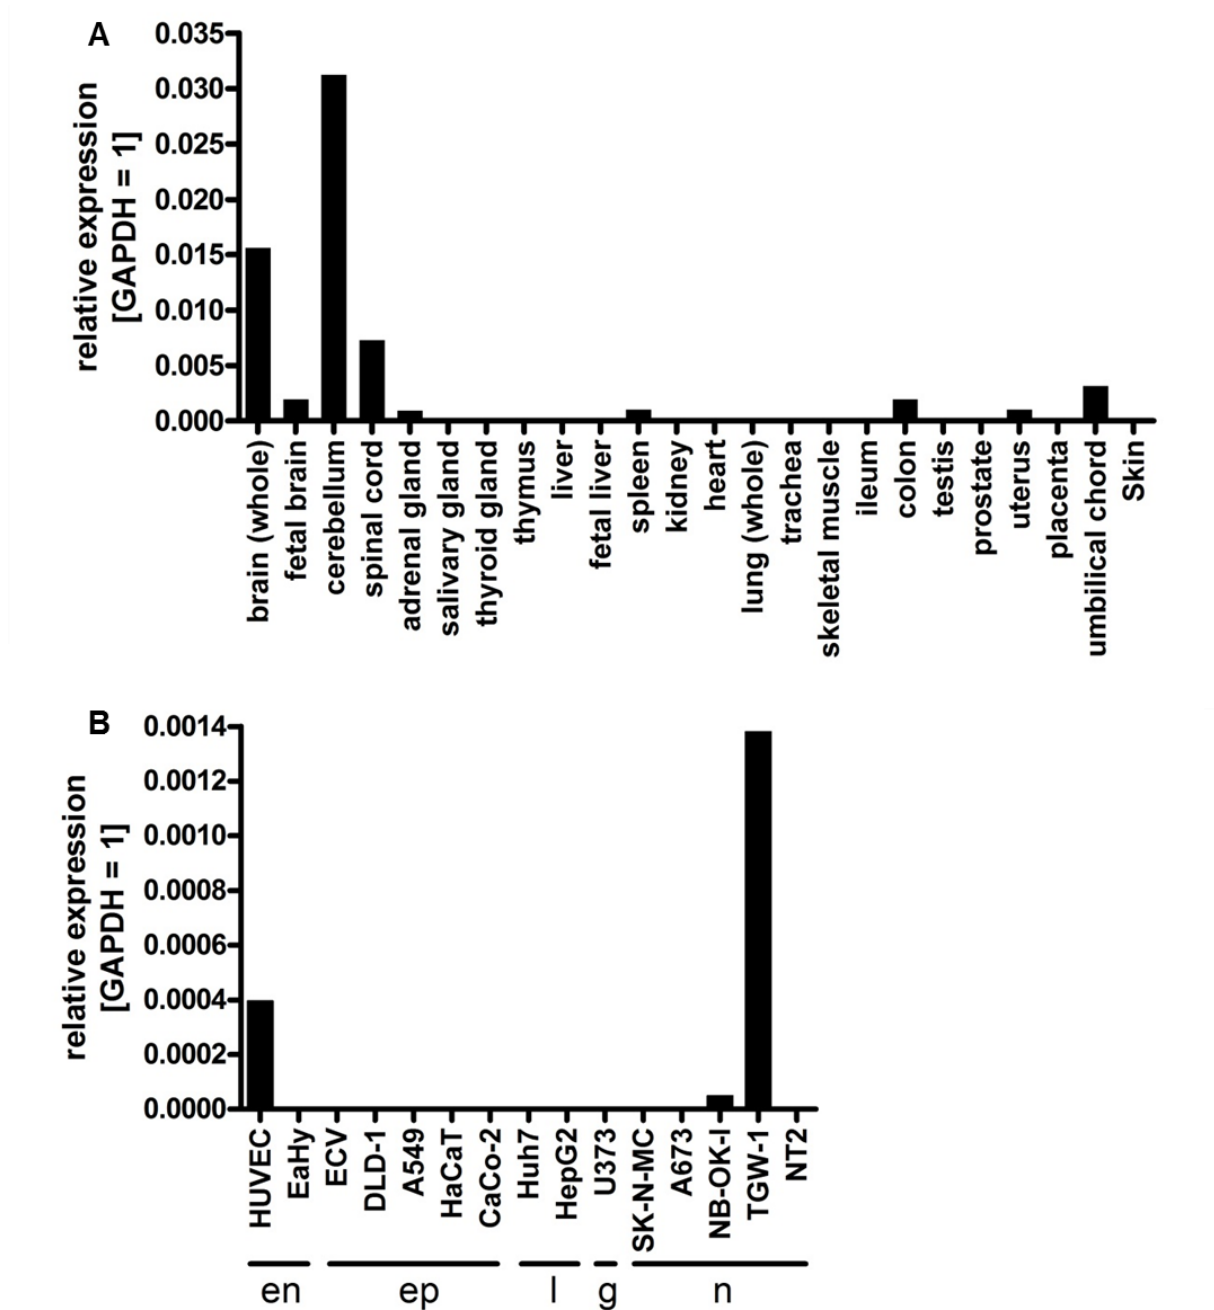

**Supplement Fig.4: Expression of SLC7A14 mRNA in human cells and tissues**

In all experiments messenger RNA amount of SLC7 members was measured by quantitative RT-PCR. GAPDH was chosen as housekeeping gene for relative determinations. A) RNA from BD Biosciences Clontech was monitored for SLC7A14 mRNA expression. B) Total RNA was isolated from several human cell lines (en: endothelial, ep: epithelial cells form different organs, l: liver, g: glia, n: neuronal).

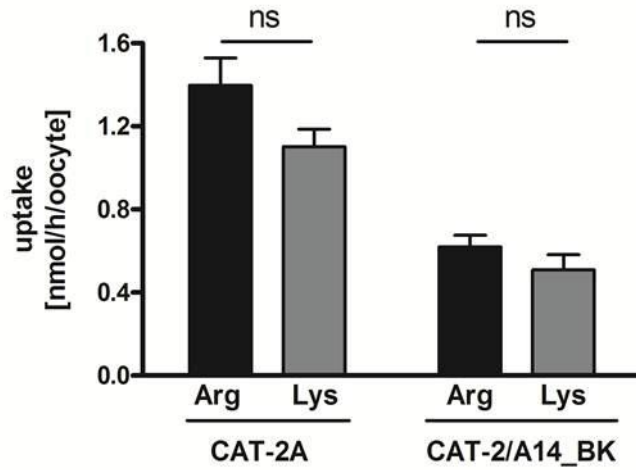

**Supplement Fig.5: Transport of [ $^3\text{H}$ ]L-arginine and [ $^3\text{H}$ ]L-lysine in *X. laevis* oocytes**

hCAT-2A and hCAT-2/A14\_BK cRNA was injected in *Xenopus laevis* oocytes. Not injected oocytes served as controls. Uptake of 1 mM [ $^3\text{H}$ ]L-arginine (black bars) and [ $^3\text{H}$ ]L-lysine (grey bars) was measured. Results obtained with non-injected oocytes were subtracted from all results. Data represent mean  $\pm$  SEM (n=7); n.s. stands for not significant.
